# Supplementary material
Source: PubMed Central journal article supplement (PMC11484517)
Supplement: awad267_supplementary_data.pdf [file awad267_supplementary_data.pdf]

**Supplementary Table 1 Cross-sectional studies on the association between plasma/serum NfL and neuroimaging markers of neurodegeneration**

| Authors                 | Citation in the main text | NfL Source | Sample source                                | Sample characteristics (No. of individuals; age)                                        | Neuroimaging modality                                                                                                                              | Neuroimaging measures associated with higher baseline NfL                                                                                                                                                                                                                                                                                                                                                                                                                                                                                                                                                                                             | Variables statistically controlled for  |
|-------------------------|---------------------------|------------|----------------------------------------------|-----------------------------------------------------------------------------------------|----------------------------------------------------------------------------------------------------------------------------------------------------|-------------------------------------------------------------------------------------------------------------------------------------------------------------------------------------------------------------------------------------------------------------------------------------------------------------------------------------------------------------------------------------------------------------------------------------------------------------------------------------------------------------------------------------------------------------------------------------------------------------------------------------------------------|-----------------------------------------|
| Mattsson et al. (2017)  | 9                         | Plasma     | ADNI                                         | CU (n = 193; 75.9 ± 4.9 y)<br>MCI (n = 197; 74.7 ± 7.5 y)<br>AD (n = 180; 75.3 ± 7.3 y) | Hippocampal volume<br>Cortical thickness (temporal composite <sup>b</sup> )<br>FDG-PET (mean uptake in ROIs <sup>c</sup> )                         | Entire sample: smaller hippocampus ( $\beta = -0.124, p < .001$ ) and lower composite temporal cortical thickness ( $\beta = -0.162, p < .001$ ); no association with the mean FDG uptake ( $\beta = -0.085, p = 0.10$ )<br>(The statistics represent the standardized coefficient for the term 'NfL' estimating the cross-sectional association between NfL and an imaging measure in a linear mixed model that has the imaging measure as the outcome variable and includes the 'NfL×time' interaction term estimating the association between baseline NfL and the rate of change in the imaging measure.)                                         | Age, sex, education, diagnosis, APOE ε4 |
| Barker et al. (2021)    | 17                        | Plasma     | 1Florida ADRC                                | CU (n = 51; 70.8 ± 5.9 y)<br>AD (n = 156; 74.8 ± 8.2 y)                                 | Hippocampal volume<br>MTL atrophy: presence or absence by visual inspection                                                                        | CU: No association with either the binary (Pearson $r = -0.10, p > 0.05$ ) or continuous (Pearson $r = 0.02, p > 0.05$ ) measure of hippocampal atrophy<br>AD: lower hippocampal volume (Pearson $r = -0.36, p < 0.0001$ )                                                                                                                                                                                                                                                                                                                                                                                                                            | N/A                                     |
| Mattsson et al. (2019)  | 18                        | Plasma     | ADNI                                         | CU (n = 401; 74.6 ± 5.6 y)<br>MCI (n = 855; 72.4 ± 7.4 y)<br>AD (n = 327; 74.9 ± 7.8 y) | GM volume (hippocampus, entorhinal cortex)<br>Cortical thickness (temporal composite <sup>b</sup> )<br>FDG-PET (mean uptake in ROIs <sup>d</sup> ) | Entire sample: smaller hippocampus ( $\beta = -4.56, p < .001$ ); thinner entorhinal cortex ( $\beta = -3.79, p < .001$ ) and composite temporal cortical thickness ( $\beta = -4.35, p < .001$ ); lower mean FDG uptake ( $\beta = -3.79, p < .001$ )<br>(The statistics represent the standardized coefficient for each imaging measure estimating the cross-sectional association between NfL and the imaging measure and in a linear mixed model that has <u>NfL as the outcome variable</u> and includes the 'imaging measure×time' interaction term estimating the association between baseline imaging measure and the rate of change in NfL.) | Age, sex                                |
| Andersson et al. (2020) | 21                        | Plasma     | BioFINDER study; Malmö Diet and Cancer Study | CU (n = 478; 72.1 ± 5.5 y)<br>MCI (n = 227; 70.6 ± 5.4 y)                               | DTI (TBSS, tract-based spatial statistics)                                                                                                         | CU: no association<br>MCI: lower FA in widespread WM regions<br>(The statistics were presented as a voxel-wise statistical map.)                                                                                                                                                                                                                                                                                                                                                                                                                                                                                                                      | Age, sex                                |

|                          |    |        |                                                              |                                                                                                                                                                                 |                                                                                                                                                                                                                            |                                                                                                                                                                                                                                                                                                                                                                                                                                                                                                                               |                                                        |
|--------------------------|----|--------|--------------------------------------------------------------|---------------------------------------------------------------------------------------------------------------------------------------------------------------------------------|----------------------------------------------------------------------------------------------------------------------------------------------------------------------------------------------------------------------------|-------------------------------------------------------------------------------------------------------------------------------------------------------------------------------------------------------------------------------------------------------------------------------------------------------------------------------------------------------------------------------------------------------------------------------------------------------------------------------------------------------------------------------|--------------------------------------------------------|
| Weston et al. (2017)     | 24 | Serum  | Dementia Research Centre, University College London          | Noncarriers (n = 11; 38.9 ± 9.5 y)<br>Presymptomatic mutation <sup>a</sup> carriers (n = 19; 36.0 ± 5.7 y)<br>Symptomatic mutation <sup>a</sup> carriers (n = 18; 46.6 ± 9.3 y) | Hippocampal volume                                                                                                                                                                                                         | All mutation carriers: smaller hippocampus (Spearman $\rho = -0.54$ , $p = 0.003$ )<br>Presymptomatic carriers: no association with hippocampal volume (statistics not reported)                                                                                                                                                                                                                                                                                                                                              | N/A                                                    |
| Shahid et al. (2022)     | 41 | Plasma | Indiana Memory and Aging Study (IMAS)                        | CU (n = 47; 70.8 ± 4.8 y)<br>MCI (n = 52; 73.0 ± 6.6 y)<br>AD (n = 19; 72.8 ± 8.4 y)                                                                                            | NODDI metrics(VF <sub>IC</sub> : intraneurite density, VF <sub>EC</sub> : extracellular hindered water components, V <sub>ISO</sub> : CSF compartment) in hippocampal subfields (CA1-3, subiculum, CA4-DG (dentate gyrus)) | Entire sample: higher V <sub>ISO</sub> ( $r = 0.36$ ; $p < 0.05$ ) and lower VF <sub>EC</sub> ( $r = -0.30$ ; $p < 0.05$ ) in CA4-DG<br>CU: higher V <sub>ISO</sub> in CA4-DG ( $r = 0.47$ ; $p < 0.05$ )<br>MCI: no association (all $ps > 0.05$ )<br>AD: no association (all $ps > 0.05$ )                                                                                                                                                                                                                                  | Age, sex, education, APOE $\epsilon 4$ , ICV           |
| Chen et al. (2021)       | 42 | Plasma | ADNI                                                         | CU (n = 67; 75.2 ± 0.6 y)<br>static MCI (n = 52; 73.4 ± 1.1 y)<br>progressive MCI (n = 68; 72.9 ± 0.9 y)<br>AD (n = 57; 74.3 ± 1.1 y)                                           | Hippocampal volume<br>FDG-PET (mean uptake in ROIs <sup>c</sup> )                                                                                                                                                          | CU and static MCI: lower hippocampal volume (CU: $\beta = -0.283$ , $p = 0.039$ ; sMCI: $\beta = -0.312$ , $p = 0.032$ ) and lower mean FDG uptake (CU: $\beta = -0.246$ , $p = 0.026$ ; sMCI: ( $\beta = -0.252$ , $p = 0.021$ ))<br>Progressive MCI and AD: lower hippocampal volume (pMCI: $\beta = -0.267$ , $p = 0.042$ ; AD: ( $\beta = -0.279$ , $p = 0.044$ ))                                                                                                                                                        | Age, sex, ICV                                          |
| Chatterjee et al. (2022) | 43 | Plasma | Kerr Anglican Retirement Village Initiative in Ageing Health | CU A $\beta$ - (n = 67 (52 SMC); 77.8 ± 5.6 y)<br>CU A $\beta$ + (n = 33 (24 SMC); 79.0 ± 5.4 y)                                                                                | Hippocampal volume                                                                                                                                                                                                         | No association (no statistics reported)                                                                                                                                                                                                                                                                                                                                                                                                                                                                                       | N/A                                                    |
| Rajan et al. (2020)      | 44 | Serum  | The Chicago Health and Aging Project (CHAP)                  | Older adults (n = 1327 (436 AD, 317 MCI; 742 underwent MRI scan); 73.5 ± 6.4 y)                                                                                                 | Hippocampal volume<br>Global cortical thickness                                                                                                                                                                            | No association with hippocampal volume (Estimate = 0.028, 95% CI: -0.119 to 0.175) or global cortical thickness (Estimate = 0.75, 95% CI: -3.25 to 4.76) (The statistics represent the coefficient for the term 'NfL' estimating the cross-sectional association between NfL and an imaging measure in a linear mixed model that has the imaging measure as the outcome variable and includes the 'NfL×time' interaction term estimating the association between baseline NfL and the rate of change in the imaging measure.) | Age, sex, race/ethnicity, education, APOE $\epsilon 4$ |

|                          |    |        |                                                              |                                                                                                                                                                                                                                                                  |                                                                                                                                           |                                                                                                                                                                                                                                                                                                                                                                                                                                                                                                                                                                                                                                                                                                          |                                                                           |
|--------------------------|----|--------|--------------------------------------------------------------|------------------------------------------------------------------------------------------------------------------------------------------------------------------------------------------------------------------------------------------------------------------|-------------------------------------------------------------------------------------------------------------------------------------------|----------------------------------------------------------------------------------------------------------------------------------------------------------------------------------------------------------------------------------------------------------------------------------------------------------------------------------------------------------------------------------------------------------------------------------------------------------------------------------------------------------------------------------------------------------------------------------------------------------------------------------------------------------------------------------------------------------|---------------------------------------------------------------------------|
| Mielke et al. (2019)     | 45 | Plasma | The Mayo Clinic Study of Aging (MCSA)                        | Middle-aged to older adults without dementia (n = 79 (64 CU, 15 MCI); 76.4 y (IQR: 71.7, 80.7))                                                                                                                                                                  | Cortical thickness (temporal composite)<br>Hippocampal volume<br>FDG-PET (mean uptake in ROIs <sup>a</sup> )<br>FA of the corpus callosum | No association (all $\beta$ s < 0.132, all $p$ s > 0.162)<br>(The statistics represent the standardized coefficient for the term 'NfL' estimating the cross-sectional association between NfL and an imaging measure in a linear mixed model that has the imaging measure as the outcome variable and includes the 'NfL*time' interaction term estimating the association between baseline NfL and the rate of change in the imaging measure.)                                                                                                                                                                                                                                                           | Age, sex, and education, ICV (in the models examining hippocampal volume) |
| Chatterjee et al. (2018) | 46 | Plasma | Kerr Anglican Retirement Village Initiative in Ageing Health | CU with PET A $\beta$ - (n = 65 (51 SMC); 77.6 $\pm$ 5.6 y)<br>CU with PET A $\beta$ + (n = 35 (25 SMC); 79.2 $\pm$ 5.4 y)                                                                                                                                       | Hippocampal volume                                                                                                                        | No significant association with hippocampal volume (left hemisphere, Pearson $r = -0.095$ , $p = 0.356$ ; right hemisphere, Pearson $r = -0.096$ , $p = 0.352$ )                                                                                                                                                                                                                                                                                                                                                                                                                                                                                                                                         | N/A                                                                       |
| Hu et al. (2019)         | 47 | Plasma | ADNI                                                         | CU A $\beta$ - (n = 130; 72.8 $\pm$ 5.5 y)<br>CU A $\beta$ + (n = 113; 73.3 $\pm$ 6.2 y)                                                                                                                                                                         | Hippocampal volume<br>FDG-PET (mean uptake in ROIs <sup>c</sup> )                                                                         | No association with hippocampal volume (CU A $\beta$ +: $\beta = -0.034$ , $p = 0.736$ ; CU A $\beta$ -: $\beta = -0.080$ , $p = 0.318$ ) and FDG uptake (CU A $\beta$ +: $\beta = -0.094$ , $p = 0.382$ ; CU A $\beta$ -: $\beta = -0.045$ , $p = 0.637$ )                                                                                                                                                                                                                                                                                                                                                                                                                                              | Age, sex, education, APOE $\epsilon$ 4                                    |
| Verberk et al. (2020)    | 49 | Plasma | Amsterdam Dementia Cohort                                    | PET A $\beta$ - (n = 76 (52 SCD, 24 MCI); 61 $\pm$ 9 y)<br>PET A $\beta$ + (n = 176 (18 SCD, 26 MCI, 132 AD); 63 $\pm$ 7 y)                                                                                                                                      | Visual rating of medial temporal lobe atrophy according to the MTA-scale (0–4)                                                            | Entire sample: more advanced MTA atrophy (Spearman $\rho = 0.33$ , $p < 0.001$ )                                                                                                                                                                                                                                                                                                                                                                                                                                                                                                                                                                                                                         | N/A                                                                       |
| Pereira et al. (2017)    | 50 | Plasma | ADNI                                                         | CU A $\beta$ - (n=57; 74.8 $\pm$ 5.2 y)<br>CU A $\beta$ + (n=37; 76.5 $\pm$ 5.2 y)<br>MCI A $\beta$ - (n=36; 74.5 $\pm$ 9.0 y)<br>MCI A $\beta$ + (n=109; 74.2 $\pm$ 6.9 y)<br>AD A $\beta$ - (n=5; 82.2 $\pm$ 5.4 y)<br>AD A $\beta$ + (n=65; 73.7 $\pm$ 7.6 y) | Cortical thickness (voxel-wise)<br>Subcortical GM volume <sup>f</sup>                                                                     | CU: no association<br>MCI A $\beta$ -: thinner PCC, lingual, inferior parietal, inferior temporal, insular, and middle frontal cortices; smaller thalamus ( $p = 0.043$ ), hippocampus ( $p = 0.004$ ), amygdala ( $p = 0.034$ ), and accumbens ( $p = 0.008$ )<br>MCI A $\beta$ +: thinner precuneus and superior parietal gyrus; smaller putamen ( $p = 0.030$ ), pallidum ( $p = 0.012$ ), hippocampus ( $p = 0.038$ ), and accumbens ( $p = 0.033$ )<br>AD A $\beta$ +: thinner precuneus, superior temporal, supramarginal, and rostral middle frontal cortices<br>(The voxel-wise p-values for the association between NfL and cortical thickness were presented as a voxel-wise statistical map.) | Age, sex                                                                  |

|                       |    |        |                                                             |                                                                                                                                                                                                              |                                                                           |                                                                                                                                                                                                                                                                                                                                                                                                                                                                                                                                                                                                                                   |                                                                                                                                          |
|-----------------------|----|--------|-------------------------------------------------------------|--------------------------------------------------------------------------------------------------------------------------------------------------------------------------------------------------------------|---------------------------------------------------------------------------|-----------------------------------------------------------------------------------------------------------------------------------------------------------------------------------------------------------------------------------------------------------------------------------------------------------------------------------------------------------------------------------------------------------------------------------------------------------------------------------------------------------------------------------------------------------------------------------------------------------------------------------|------------------------------------------------------------------------------------------------------------------------------------------|
| Shi et al. (2019)     | 51 | Plasma | Community-based sample from Nanjing, China                  | CU (n = 87; 64.8 ± 7.4 y)<br>amnesic MCI (n = 68; 64.5 ± 7.7 y)                                                                                                                                              | Hippocampal volume, cortical volume (voxel-wise)                          | Smaller hippocampal volume ( $r = -0.259, p < 0.05$ ) and cortical volume of left inferior and middle temporal gyri ( $r = -0.515, p < 0.001$ )                                                                                                                                                                                                                                                                                                                                                                                                                                                                                   | Age, gender, education                                                                                                                   |
| Kang et al. (2020)    | 52 | Plasma | ADNI                                                        | CU A $\beta$ - (n = 66; 75.7 ± 5.4 y)<br>CU A $\beta$ + (n = 17; 76.9 ± 6.0 y)<br>MCI A $\beta$ - (n = 48; 75.3 ± 8.0 y)<br>MCI A $\beta$ + (n = 112; 74.3 ± 7.3 y)<br>AD A $\beta$ + (n = 73; 74.0 ± 7.6 y) | GM VBM (temporal composite <sup>9</sup> ; entorhinal cortex; hippocampus) | MCI A $\beta$ +: lower GM density in the lateral temporal cortex and hippocampus<br>MCI A $\beta$ -: lower GM density in the insular cortex<br>AD A $\beta$ +: lower GM density in the hippocampus, precuneus/PCC, angular, dorsal lateral and medial frontal, and lateral temporal cortices, and cerebellum (The statistics were reported as voxel-wise statistical maps, as well as tables providing statistics at specific coordinates)                                                                                                                                                                                        | Age, sex, APOE $\epsilon$ 4, education, CSF p-tau (log), time between the NfL measurements and MRI scan                                  |
| Parbo et al. (2020)   | 55 | Plasma | Community and Memory clinics in Jutland and Funen, Denmark. | MCI and early AD (n = 27; 73.6 ± 6.1 y)                                                                                                                                                                      | Cortical thickness (voxel-wise)<br>DTI (cortex; voxel-wise)               | Lower cortical thickness in a small area in the superior frontal cortex<br>Higher MD in the temporal and cingulate cortices (The statistics were reported as voxel-wise statistical maps.)                                                                                                                                                                                                                                                                                                                                                                                                                                        | N/A                                                                                                                                      |
| Benedet et al. (2020) | 57 | Plasma | ADNI                                                        | CU (n = 382; 73.5 ± 6.9 y)<br>CI (n = 767 (420 MCI, 347 AD); 74.4 ± 7.8 y)                                                                                                                                   | GM VBM (voxelwise)                                                        | CU with APOE $\epsilon$ 4: lower volume of temporal and frontal cortices and PCC<br>CU without APOE $\epsilon$ 4: no association with GM atrophy<br>CI: lower volume of frontal and temporal cortices, including medial temporal lobe (The voxel-wise $T$ values for the association between NfL and grey matter VBM were presented as a voxel-wise statistical map.)                                                                                                                                                                                                                                                             | Age at initial NfL measurement, sex, scanner field strength (1.5 or 3 T), APOE $\epsilon$ 4, time between plasma collection and MRI scan |
| Mayeli et al. (2019)  | 68 | Plasma | ADNI                                                        | MCI (n = 149 (some converted to AD); 75.4 ± 6.6 y)                                                                                                                                                           | FDG-PET (44 cortical regions affected by the AD pathology)                | MCI: lower uptake in the left fusiform ( $r = -0.191, p < 0.05$ ), right angular ( $r = -0.256, p < 0.01$ ), bilateral middle temporal (both $r$ s < -0.176, both $p$ s < 0.05), right inferior parietal ( $r = -0.241, p < 0.01$ ) cortices<br>AD: lower uptake in the left hippocampal ( $r = -0.188, p < 0.05$ ), bilateral parahippocampal (both $r$ s < -0.268, both $p$ s < 0.001), bilateral fusiform (both $r$ s < -0.236, both $p$ s < 0.01), right angular ( $r = -0.249, p < 0.01$ ), bilateral middle temporal (both $r$ s < -0.226, both $p$ s < 0.01), right inferior temporal ( $r = -0.283, p < 0.001$ ) cortices | Age, sex (Results with the additional adjustment for the Alzheimer's Disease Rating Scale (ADAS) are also reported)                      |

|                          |     |        |                                       |                                                                                                               |                                                                                                                |                                                                                                                                                                                                                                                                                                                                                                                                                                                                                                                                                                                                        |                                                                                               |
|--------------------------|-----|--------|---------------------------------------|---------------------------------------------------------------------------------------------------------------|----------------------------------------------------------------------------------------------------------------|--------------------------------------------------------------------------------------------------------------------------------------------------------------------------------------------------------------------------------------------------------------------------------------------------------------------------------------------------------------------------------------------------------------------------------------------------------------------------------------------------------------------------------------------------------------------------------------------------------|-----------------------------------------------------------------------------------------------|
| Benedet et al. (2019)    | 69  | Plasma | ADNI                                  | CU (n = 81; 75.6 ± 5.0 y)<br>CI (n = 162; 64.6 ± 7.2 y)                                                       | FDG-PET (voxelwise)                                                                                            | CU Aβ+: lower uptake in the PCC, parietal, and temporal areas<br>CU Aβ-: lower uptake in small areas in the parietal cortex<br>CI Aβ+: lower uptake in the PCC/precuneus, and frontal, temporal, and occipital cortices<br>CI Aβ-: lower uptake in small areas in the frontal and temporal cortices<br>(The voxel-wise <i>T</i> values for the association between NfL and FDG standard uptake ratio were presented as a voxel-wise statistical map.)<br>The voxel-wise associations between plasma NfL and cortical FDG standard uptake value ratio in the entire CU and entire CI are also reported. | Age, sex, collection time point, time between the plasma measurement and [18F]FDG acquisition |
| Schultz et al. (2020)    | 71  | Serum  | DIAN observational study              | Noncarriers (n = 84; 40.5 ± 10.7 y)<br>Mutation <sup>a</sup> carriers (n = 117; 38.6 ± 10.8 y)                | DTI (voxel-wise; 12 white matter tract ROIs <sup>h</sup> )                                                     | Noncarriers: no association with DTI index in the entire WM skeleton<br>Carriers: lower FA and higher MD, RD, and AD (axial diffusivity) across almost the entire WM skeleton and all WM tracts ( $ 0.007  \leq \text{unstandardized } B_s \leq  0.344 $ , all $p_s \leq 0.040$ ) except the corticospinal tract MD ( $B = 0.032$ , $p = 0.069$ ) and AD ( $B = 0.007$ , $p = 0.785$ )<br>(The voxel-wise <i>p</i> -values for the association between NfL and DTI metrics were presented as a voxel-wise statistical map.)                                                                            | Age, sex, mutation status, NfL×mutation status interaction                                    |
| Marks et al. (2021)      | 72  | Plasma | The Mayo Clinic Study of Aging (MCSA) | CU (n = 864; age: median = 75.6 y, IQR = 67.0, 80.9)<br>MCI (n = 131; age: median = 81.4 y, IQR = 75.6, 85.3) | Cortical thickness (temporal, frontal, parietal, occipital)<br>Hippocampal volume<br>FA of the corpus callosum | No association (cortical thickness: $\beta_s \leq  0.016 $ , $p_s \geq 0.156$ ; hippocampal volume: $\beta = -0.121$ , $p = 0.067$ ; FA of the corpus callosum: $\beta = -0.005$ , $p = 0.198$ )<br>(The statistics represent the standardized coefficient for the term 'NfL' estimating the cross-sectional association between NfL and an imaging measure in a linear mixed model that has the imaging measure as the outcome variable and includes the 'NfL×time' interaction term estimating the association between baseline NfL and the rate of change in the imaging measure.)                  | Age, sex, education                                                                           |
| Steinacker et al. (2019) | 100 | Serum  | German FTLN Consortium                | CU (n = 15; 64.8 ± 11.3 y)<br>MCI (n = 17; 63.1 ± 9.3 y)<br>AD (n = 26; 67.0 ± 8.1 y)                         | Brain volume (201 regions)                                                                                     | No association with brain volume in MCI, and AD ( $p > 0.05$ )                                                                                                                                                                                                                                                                                                                                                                                                                                                                                                                                         | N/A                                                                                           |

AD, dementia of Alzheimer's type; ADNI, Alzheimer's disease neuroimaging initiative; Aβ+, elevated amyloid beta; Aβ- normal amyloid beta; CU, cognitively unimpaired; DIAN, Dominantly Inherited Alzheimer Network; DTI, diffusion tensor imaging; f/u, follow up; GM, gray matter; ICV, intracranial volume; MCI, mild cognitive impairment; MD, mean diffusivity; NODDI, neurite orientation dispersion and density imaging; PCC, posterior cingulate cortex; RD, radial diffusivity; SCD, subjective cognitive decline; VBM, voxel-based morphometry; VF<sub>EC</sub>, extra-cellular volume fraction; V<sub>ISO</sub>, isotropic volume fraction

<sup>a</sup>, mutations in the APP, PSEN1, or PSEN2 gene; <sup>b</sup>, entorhinal, inferior and middle temporal, and fusiform gyrus; <sup>c</sup>, lateral and medial frontal, anterior cingulate, posterior cingulate, lateral parietal, and temporal regions; <sup>d</sup>, angular gyrus, temporal lobe, and posterior cingulate cortex; <sup>e</sup>, left and right angular gyri, bilateral posterior cingulate, and left middle/inferior temporal gyrus; <sup>f</sup>, hippocampus, amygdala, thalamus, caudate, putamen, pallidum, accumbens; <sup>g</sup>, bilateral middle and inferior temporal gyri, fusiform gyrus, entorhinal cortex, and hippocampus; <sup>h</sup>, inferior longitudinal fasciculus, superior longitudinal fasciculus, frontal occipital fasciculus, perforant pathway, uncinata fasciculus, cingulum, frontal aslant, corticospinal, anterior corpus callosum, posterior corpus callosum, forceps minor, forceps major

**Supplementary Table 2 Longitudinal studies on the association between baseline NfL and change in neuroimaging markers of neurodegeneration**

| Authors                | Citation in the main text | NfL Source | Sample source                                       | Baseline sample characteristics (No. of individuals; age)                                                                                                                       | MRI F/U (m: month(s); y: year(s))                                                                                 | Neuroimaging modality                                                                                                          | Changes in neuroimaging measures associated with higher baseline NfL                                                                                                                                                                                                                                                                                                                                                                                                                                                                                                                                                                                                                                                                                                                                                                                                                                                                  | Variables statistically controlled for                                          |
|------------------------|---------------------------|------------|-----------------------------------------------------|---------------------------------------------------------------------------------------------------------------------------------------------------------------------------------|-------------------------------------------------------------------------------------------------------------------|--------------------------------------------------------------------------------------------------------------------------------|---------------------------------------------------------------------------------------------------------------------------------------------------------------------------------------------------------------------------------------------------------------------------------------------------------------------------------------------------------------------------------------------------------------------------------------------------------------------------------------------------------------------------------------------------------------------------------------------------------------------------------------------------------------------------------------------------------------------------------------------------------------------------------------------------------------------------------------------------------------------------------------------------------------------------------------|---------------------------------------------------------------------------------|
| Mattsson et al. (2017) | 9                         | Plasma     | ADNI                                                | CU (n = 193; 75.9 ± 4.9 y)<br>MCI (n = 197; 74.7 ± 7.5 y)<br>AD (n = 180; 75.3 ± 7.3 y)                                                                                         | 6, 12, 18, 24, 36, 48 m                                                                                           | Hippocampal volume<br>Cortical thickness (temporal composite <sup>b</sup> )<br>FDG-PET (mean uptake in ROIs <sup>c</sup> )     | Entire sample: greater rates of hippocampal atrophy ( $\beta = -0.0189$ , $p < 0.001$ ), decline of temporal composite cortical thickness ( $\beta = -0.0489$ , $p < 0.001$ ), and hypometabolism ( $\beta = -0.0474$ , $p < 0.001$ )                                                                                                                                                                                                                                                                                                                                                                                                                                                                                                                                                                                                                                                                                                 | Age, sex, education, diagnosis, APOE $\epsilon 4$                               |
| Moscoso et al. (2021)  | 23                        | Plasma     | ADNI                                                | CU (n = 374 (A $\beta$ +; 32 %); 74.8 ± 6.6 y)<br>CI (n = 734 (A $\beta$ +; 65 %); 73.6 ± 8.0 y)                                                                                | Median f/u duration<br>CU:<br>- GM volume: 5.0 y<br>- FDG-PET: 2 y<br>CI:<br>- GM volume: 2.1 y<br>- FDG-PET: 2 y | GM volume (voxelwise; temporal composite <sup>b</sup> ; hippocampus)<br>FDG-PET (voxelwise; mean uptake in ROIs <sup>d</sup> ) | <i>GM volume</i><br>CU A $\beta$ -: greater rate of atrophy of small cortical areas in the paracentral lobule and superior frontal gyrus<br>CU A $\beta$ +: greater rate of atrophy of wide areas across precuneus, parietal, temporal, and lateral frontal cortices<br>CI A $\beta$ -: greater rate of atrophy of almost all frontal cortex, precuneus, and lateral temporal cortices<br>CI A $\beta$ +: greater rate of atrophy of PCC, paracentral lobule, temporal, and some frontal cortices<br><i>FDG-PET</i><br>CU A $\beta$ -: no association<br>CU A $\beta$ +: greater rate of hypometabolism in the temporal and parietal cortices<br>CI A $\beta$ -: No association<br>CI A $\beta$ +: greater rate of hypometabolism in the precuneus/PCC, lateral parietal, and temporal cortices<br>(The voxel-wise $r$ values for the association between NfL and an imaging measure were presented as a voxel-wise statistical map.) | Age, sex, (MRI scanner field strength (1.5 or 3 T) and ICV for atrophy measures |
| Weston et al. (2017)   | 24                        | Serum      | Dementia Research Centre, University College London | Noncarriers (n = 11; 38.9 ± 9.5 y)<br>Presymptomatic mutation <sup>a</sup> carriers (n = 19; 36.0 ± 5.7 y)<br>Symptomatic mutation <sup>a</sup> carriers (n = 18; 46.6 ± 9.3 y) | 33 participants had 1 f/u<br>Mean ± SD interval: 1.3 ± 0.5 y                                                      | Hippocampal volume                                                                                                             | All carriers: no association with hippocampal volume (Spearman $\rho = 0.37$ , $p = 0.09$ )<br>Presymptomatic carriers: no association with hippocampal volume (statistics not reported)                                                                                                                                                                                                                                                                                                                                                                                                                                                                                                                                                                                                                                                                                                                                              | N/A                                                                             |

|                        |    |        |                                             |                                                                                                           |                                                                             |                                                                                                                     |                                                                                                                                                                                                                                                                                                                            |                                                                           |
|------------------------|----|--------|---------------------------------------------|-----------------------------------------------------------------------------------------------------------|-----------------------------------------------------------------------------|---------------------------------------------------------------------------------------------------------------------|----------------------------------------------------------------------------------------------------------------------------------------------------------------------------------------------------------------------------------------------------------------------------------------------------------------------------|---------------------------------------------------------------------------|
| Simrén et al. (2021)   | 27 | Plasma | AddNeuro Med study                          | CU (n = 99; 73.0 ± 6.1 y)<br>MCI (n = 107; 74.5 ± 5.9 y)<br>AD (n = 103; 76.4 ± 5.8 y)                    | 3, 12 m                                                                     | GM VBM                                                                                                              | Entire sample: greater rate of atrophy in scattered areas across precuneus, temporal, and medial and superior frontal<br>No association between change in NfL and change in GM VBM<br>(The voxel-wise <i>T</i> values for the association between NfL and grey matter VBM were presented as a voxel-wise statistical map.) | Age, sex, education, APOE ε4                                              |
| Preische et al. (2019) | 32 | Serum  | DIAN observational study                    | Noncarriers (n = 162; 38.7 (19.5-69.5) y)<br>Mutation <sup>e</sup> Carriers (n = 243; 39.3 (18.0-67.8) y) | 196/405 subjects had 1-5 f/u<br>Mean no. of visits: 2.5<br>Median f/u: 3 y  | Precuneus cortical thickness                                                                                        | Carriers: greater rates of decline in the precuneus volume ( <i>B</i> = -0.105, <i>p</i> < 0.001)<br>Associations between change in NfL and change in precuneus atrophy rate, as well as FDG uptake are also reported in the original paper.                                                                               | Age, sex                                                                  |
| Rajan et al. (2020)    | 44 | Serum  | The Chicago Health and Aging Project (CHAP) | Older adults (n = 1327 (436 AD, 317 MCI; 742 underwent MRI scan; 183 had ≥ 2 scans); 73.5 ± 6.4 y)        | ≤ 6 f/u for ≤ 19 y                                                          | Hippocampal volume<br>Global cortical thickness                                                                     | Greater rates of decline in the hippocampal volume (Estimate = -0.049, 95% CI: -0.083 to -0.015) and global cortical thickness (Estimate = -1.57, 95% CI: -3.05 to -0.09)                                                                                                                                                  | Age, gender, race/ethnicity, education, APOE ε4                           |
| Mielke et al. (2019)   | 45 | Plasma | The Mayo Clinic Study of Aging (MCSA)       | Middle-aged to older adults without dementia (n = 79 (64 CU, 15 MCI); 76.4 (IQR: 71.7, 80.1))             | ≤ 2 f/u (15, 30 m)                                                          | Cortical thickness (temporal composite)<br>FDG-PET (mean uptake in ROIs <sup>e</sup> )<br>FA of the corpus callosum | Greater rates of decline in the hippocampal volume ( <i>β</i> = -0.022, <i>p</i> = 0.023), temporal cortical thickness ( <i>β</i> = -0.007, <i>p</i> = 0.019), hypometabolism ( <i>β</i> = -0.010, <i>p</i> = 0.018), and FA of the corpus callosum ( <i>β</i> = -0.002, <i>p</i> = 0.015)                                 | Age, sex, and education, ICV (in the models examining hippocampal volume) |
| Hu et al. (2019)       | 47 | Plasma | ADNI                                        | CU Aβ- (n = 130; 72.8 ± 5.5 y)<br>CU Aβ+ (n = 113; 73.3 ± 6.2 y)                                          | f/u range: 1-10 y > 75 % of the participants had ≥ 3 y of f/u               | Hippocampal volume                                                                                                  | CU Aβ-: no association with hippocampal volume ( <i>β</i> = -0.001, <i>p</i> = 0.931)<br>CU Aβ+: greater rate of atrophy of the hippocampus ( <i>β</i> = -0.035, <i>p</i> = 0.009)                                                                                                                                         | Age, sex, education, APOE ε4                                              |
| Pereira et al. (2021)  | 48 | Plasma | BioFINDE R                                  | Nondemented (n = 159 (52 CU, 44 SCD, 63 MCI); 69.2 (42.4-87.5) y)                                         | Median no. of visits = 2 y (IQR = 1)<br>median f/u time = 1.6 y (IQR = 0.7) | Hippocampal volume<br>Cortical thickness (temporal composite <sup>b</sup> )                                         | Greater rate of hippocampal atrophy ( <i>t</i> = -5.014, <i>p</i> < 0.001, Cohen's <i>d</i> = -0.79)<br>Greater rate of decline in the temporal cortical thickness ( <i>t</i> = -3.043, <i>p</i> = 0.003, Cohen's <i>d</i> = -0.48)                                                                                        | Age, sex, amyloid status, APOE ε4, presence of cognitive impairment, ICV  |

|                          |     |        |                                       |                                                                                                               |                                                                           |                                                                                                                |                                                                                                                                                                                                                                                                                                                                                                |                                                                                                                     |
|--------------------------|-----|--------|---------------------------------------|---------------------------------------------------------------------------------------------------------------|---------------------------------------------------------------------------|----------------------------------------------------------------------------------------------------------------|----------------------------------------------------------------------------------------------------------------------------------------------------------------------------------------------------------------------------------------------------------------------------------------------------------------------------------------------------------------|---------------------------------------------------------------------------------------------------------------------|
| Benedet et al. (2020)    | 57  | Plasma | ADNI                                  | CU (n = 382; 73.5 ± 6.9 y)<br>CI (n = 767 (420 MCI, 347 AD); 74.4 ± 7.8 y)                                    | ≤ 48 m                                                                    | GM VBM (voxelwise)                                                                                             | CU: greater rate of atrophy of primarily frontal and temporal cortices at 48 months than at the baseline<br>CI: greater rate of atrophy of mainly temporal regions over 12, 24, 36, and 48 months than at the baseline<br>(The voxel-wise <i>T</i> values for the association between NfL and grey matter VBM were presented as a voxel-wise statistical map.) | Age at initial NfL measurement, sex, scanner type (1.5 or 3 T), APOE ε4, time between plasma collection and MRI     |
| Mayeli et al. (2019)     | 68  | Plasma | ADNI                                  | MCI (n = 149 (some progressed to AD); 75.4 ± 6.6 y)                                                           | 6, 12 m                                                                   | FDG-PET (44 cortical regions affected by the AD pathology)                                                     | MCI: lower uptake in the right hippocampus ( $r = -0.213, p < 0.05$ ) at follow-up<br>AD: lower uptake in the right angular ( $r = -0.265, p < 0.05$ ), bilateral inferior temporal ( $r \leq -0.245, p \leq 0.05$ ), posterior cingulate ( $r = 0.510, p < 0.05$ ) cortices at follow-up                                                                      | Age, sex (Results with the additional adjustment for the Alzheimer's Disease Rating Scale (ADAS) are also reported) |
| Benedet et al. (2019)    | 69  | Plasma | ADNI                                  | CU (n = 302; 73.6 ± 7.2 y)<br>CI (n = 713; 74.1 ± 7.7 y)                                                      | ≤ 24 m<br>Average: 9.2 m                                                  | FDG-PET (voxelwise)                                                                                            | CI Aβ+: greater rate of hypometabolism in the PCC and frontal and temporal cortices over 24 months than at the baseline<br>No associations in the other subgroups<br>(The voxel-wise <i>T</i> values for the association between NfL and FDG-uptake were presented as a voxel-wise statistical map.)                                                           | Age, sex, collection time point, time between the plasma measurement and [18F]FDG acquisition                       |
| Marks et al. (2021)      | 72  | Plasma | The Mayo Clinic Study of Aging (MCSA) | CU (n = 864; age: median = 75.6 y, IQR = 67.0, 80.9)<br>MCI (n = 131; age: median = 81.4 y, IQR = 75.6, 85.3) | Median f/u duration<br>CU: 6.2y<br>MCI: 5.0 y                             | Cortical thickness (temporal, frontal, parietal, occipital)<br>Hippocampal volume<br>FA of the corpus callosum | Entire sample: greater rate of hippocampal atrophy ( $\beta = -0.046, p < 0.001$ ) and corpus callosum FA decline ( $\beta = -0.003, p < 0.001$ )                                                                                                                                                                                                              | Age, sex, education                                                                                                 |
| Steinacker et al. (2018) | 100 | Serum  | German FTLD consortium                | CU (n = 15; 64.8 ± 11.3 y)<br>MCI (n = 17; 63.1 ± 9.3 y)<br>AD (n = 26; 67 ± 8.1 y)                           | 13 AD, 13 MCI, 12 CU had ≥ 1 f/u MRI scan<br>Intervals: approximately 1 y | Brain volume (201 regions)                                                                                     | No association with the regional cortical volume at follow-up in either the AD or MCI group ( $p > 0.05$ )                                                                                                                                                                                                                                                     | N/A                                                                                                                 |
| Cavedo et al. (2020)     | 113 | Plasma | INSIGHT-preAD cohort                  | CU with subjective memory complaints (n = 276 (4 converted to AD after 24m, 1 to AD after 36m); 75.7 ± 3.4 y) | 1 f/u with an interval of 24 m                                            | Volume of basal forebrain cholinergic system (whole, Ch1/2, Ch4)                                               | No association with the atrophy rate of the whole basal forebrain cholinergic system and the subdivision volumes (Estimate = 0.002, $p = 0.753$ , Cohen's $f < 0.001$ )                                                                                                                                                                                        | Age, sex, education, amyloid status, APOE ε4, tau, tau×NfL                                                          |



---

AD, dementia of Alzheimer's type; ADNI, Alzheimer's disease neuroimaging initiative; A $\beta$ +, elevated amyloid beta; A $\beta$ - normal amyloid beta; CU, cognitively unimpaired; DIAN, Dominantly Inherited Alzheimer Network; DTI, diffusion tensor imaging; f/u, follow up; GM, gray matter; ICV, intracranial volume; INSIGHT-preAD, Investigation of Alzheimer's Predictors in Subjective Memory Complainers; MCI, mild cognitive impairment; PCC, posterior cingulate cortex; SCD, subjective cognitive decline; SMC, subjective memory complainers; VBM, voxel-based morphometry  
<sup>a</sup>. mutations in the APP, PSEN1, or PSEN2 gene; <sup>b</sup>. entorhinal, inferior and middle temporal, and fusiform gyrus; <sup>c</sup>. lateral and medial frontal, anterior cingulate, posterior cingulate, lateral parietal, and temporal regions; <sup>d</sup>. PCC, and angular and inferior temporal gyrus; <sup>e</sup>. left and right angular gyri, bilateral posterior cingulate, and left middle/inferior temporal gyrus
